# Supplementary material
Source: MDPI journal article supplement (https://www.mdpi.com/2076-3263/9/10/422)
Supplement: s1 [file s1]

Archive with 5 entries (5 files):
- CAM-Response-spectral-acceleration.pdf
- Geology-based-SWV-modelling.pdf
- MMI events SEA.xlsx
- MMI Events SEC.xlsx
- Shear wave velocity data.xlsx
