# Supplementary material
Source: MDPI journal article supplement (https://www.mdpi.com/2076-3263/9/10/422)
Supplement: s1 [file s1 › MMI events SEA.xlsx]

## Sheet: Event Selected
Location	Year	Mb	ML	Mwp	Depth (km)	Mw (converted)		Epicentre Coordinate
NSW		(preferred scale marked in red)						S	E
Newcastle	1989		5.5	5.4	11	5.4		32.95	151.61
Picton	1973	5.5	5.5		21	5.8742		34.17	150.32
Gunning	1934		5.6		10	5.3		34.8	149.2
Maitland	1868		5.3		10	5		32.8	151.6
VIC
Boolarra/South Gippsland	1969		5.3		19	5		38.47	146.3
Warrnambol/Otway Basin	1903		5.3			5		38.43	142.53
SA
Adelaide	1954		5.4		4	5.1		34.93	138.67
Motpena/Nilpena	1939		5.8			5.5		32	138

## Sheet: GA data
FID	earthquake_id	azimuthal_gap	azimuth_horizontal_uncertainty	depth	depth_uncertainty	description	epicentral_time	evaluation_mode	evaluation_status	event_creation_time	event_id	event_modification_time	latitude	longitude	mb	md	ml	ms	origin_id	origin_time	origin_time_uncertainty	phase_count	preferred_magnitude	preferred_magnitude_type	max_horizontal_uncertainty	min_horizontal_uncertainty	source	standard_error	station_count
earthquakes.fid--4e0958aa_16c64c2f333_1e7f	265383	108.02	253.57	11	0.7404	Newcastle NSW. md 5.5 (CNB). 13 people killed, more than 100 injured and estimated 1.1 billion U.S. dollars damage I=VIII MM caused in the Newcastle area. Damage occurred as far away as Liverpool, Scone and Gladstone. Felt in a 200,000 sq.km. area of New South Wales and the Australian Capital Territory from Albury and Cooma to Coffs Harbour and Inverell and as far west as Narromine. Also felt by …			FINL	2008-04-02T18:41:09	ga1989zmqbgf	2015-11-30T14:26:42	-32.946	151.607	5.7		5.5	4.6	620500	1989-12-27T23:26:57	68.06	27	5.4	Mwp	2.483	1.3203	AUST	74.6207	27
earthquakes.fid--4e0958aa_16c64c2f333_1e80	82852	97.68		21		Picton NSW			FINL	2008-05-09T11:28:09	ga1973eulthm	2009-12-15T10:01:43	-34.17	150.32	5.5		5.5	5.3	619923	1973-03-09T19:09:14		0	5.5	mb				2.08787	0
earthquakes.fid--4e0958aa_16c64c2f333_1e84	4540	210.85		10		Gunning NSW			FINL	2008-04-02T10:13:22	ga1934wsxuwe	2010-01-27T14:54:41	-34.8	149.2			5.6	5.2	619549	1934-11-18T21:58:41		0	5.6	ML				78.2519	0
earthquakes.fid--4e0958aa_16c64c2f333_1e7e	1977	0		10		Maitland NSW. Damage in Newcastle NSW. See Rev WB Clarke (1868) for description of effects. Isoseismal map in BMR Atlas III.			FINL	2013-10-10T12:15:00	ga1868lzhopf	2012-03-06T14:34:31	-32.8	151.6			5.3		619438	1868-06-18T14:00:00		0	5.3	ML			AUST		0
earthquakes.fid--53c2ed44_16cdf6361c9_-49f4	53194	194.29		19		Boolarra VIC			FINL	2008-04-02T12:34:27	ga1969maxvrt	2009-11-24T15:35:19	-38.47	146.3			5.3	4.8	619774	1969-06-20T11:15:28		0	5.3	ML				7.97787	0
earthquakes.fid--53c2ed44_16cdf6361c9_-49f5	2495	278.8	225.49	0	16.5759	Warrnambol / Otway Basin, VIC.			FINL	2008-04-02T10:12:50	ga1903nsxstw	2016-09-22T16:46:30	-38.43	142.53			5.3		619499	1903-07-14T10:29:00	109.27	15	5.3	ML	9.9642	3.1899	AUST	5.4169	15
earthquakes.fid--3b857a77_16cdf635614_-3263	7254	171.61		4		Adelaide SA			FINL	2008-04-02T10:15:01	ga1954edwgfk	2010-01-27T14:54:41	-34.93	138.67			5.4	5	619595	1954-02-28T18:09:52		0	5.4	ML				9.40264	0
earthquakes.fid--3b857a77_16cdf635614_-325e	5149	223.47		0		Motpena SA			FINL	2008-04-02T10:13:37	ga1939fymvhr	2010-01-27T14:54:41	-32	138			5.2	5.8	619560	1939-03-26T03:56:00		0	5.8	ML				3.30758	0

## Sheet: Recorded MMI
Events		Mw	Distance	Recorded MMI
NSW
Newcastle		5.4	15	6
%MMI 8 caused by alluvial fill, ignored		5.4	50	5
%alluvial fill SWV around 200~400 m/s		5.4	100	4
Picton		5.8742	40	5
Gunning		5.3	10	6.5
		5.3	30	5
		5.3	100	4
Maitland		5	10	6
VIC
Boolarra/South Gippsland		4.96385	10	6
		4.96385	50	4
Warrnambol/Otway Basin		5	5	7
		5	20	5
		5	50	4
SA
Adelaide		5.1	15	6
		5.1	30	5
		5.1	120	4
Motpena/Nilpena		5.5	10	6.5
		5.5	20	6
		5.5	80	5
		5.5	180	4

## Sheet: Estimated MMI
CAM						A12						SGC09
VIC						VIC						VIC
4.96385	10	6	5.90226			4.96385	10	6	5.21626			4.96385	10	6	5.64827
4.96385	50	4	4.25446			4.96385	50	4	3.8303			4.96385	50	4	4.43492
5	5	7	6.79041			5	5	7	6.35134			5	5	7	6.09561
5	20	5	4.92276			5	20	5	4.48873			5	20	5	4.94102
5	50	4	4.25446			5	50	4	3.8303			5	50	4	4.43492
NSW						NSW						NSW
5.4	15	6	5.94843			5.4	15	6	5.20338			5.4	15	6	5.73678								standard
5.4	50	5	4.55091			5.4	50	5	4.15438			5.4	50	5	4.65108								3	3
5.4	100	4	4.19371			5.4	100	4	3.85448			5.4	100	4	4.01069								10	10
5.8742	40	5	5.17592			5.8742	40	5	4.62597			5.8742	40	5	5.3906
5.3	10	6.5	6.34882			5.3	10	6.5	5.70855			5.3	10	6.5	5.99471
5.3	30	5	4.83394			5.3	30	5	4.42397			5.3	30	5	4.84203
5.3	100	4	4.1391			5.3	100	4	3.77045			5.3	100	4	3.9378
5	10	6	5.91288			5	10	6	5.21626			5	10	6	5.64827
SA						SA						SA
5.1	15	6	5.52871			5.1	15	6	4.76091			5.1	15	6	5.38431
5.1	30	5	4.74446			5.1	30	5	4.27198			5.1	30	5	4.75846
5.1	120	4	4.05389			5.1	120	4	3.64317			5.1	120	4	3.59867
5.5	10	6.5	6.6334			5.5	10	6.5	6.016			5.5	10	6.5	6.20679
5.5	20	6	5.70437			5.5	20	6	4.90246			5.5	20	6	5.55394
5.5	80	5	4.37796			5.5	80	5	3.91584			5.5	80	5	4.2981
5.5	180	4	4.01409			5.5	180	4	3.84672			5.5	180	4	3.41655
