# Supplementary material
Source: MDPI journal article supplement (https://www.mdpi.com/2076-3263/9/10/422)
Supplement: s1 [file s1 › MMI Events SEC.xlsx]

## Sheet: SEC-MMI
No.	Year	Moment Magnitude (M)	Distance (km)	MMI
1	1445	6.25	11	8
		6.25	27	7
		6.25	59	6
2	1509	5	37	5
3	1510	5	37	5
4	1519	5	75	4
5	1556	5.5	94	5
		5.5	167	4
6	1558	5.5	11	6
		5.5	34	5
7	1574	5.75	91	5
		5.75	180	4
8	1584	5.25	112	4
9	1599	5.5	169	4
10	1600	7	155	6
11	1604	8	57	8
		8	119	7
		8	205	6
12	1605	7.5	103	7
		7.5	196	6
13	1611	6.25	29	7
14	1641	5.75	13	7
		5.75	32	6
		5.75	69	5
15	1651	5.5	11	7
		5.5	230	4
16	1792	7	85	6
17	1806	6	9	8
		6	18	7
		6	41	6
		6	86	5
18	1860	5.5	147	4
19	1874	5	15	6
		5	42	5
20	1875	6	289	4
21	1890	5.75	232	4
22	1905	5.5	173	4
23	1911	6	233	4
24	1936	6.75	8	9
		6.75	17	8
		6.75	41	7
		6.75	88	6
		6.75	198	5
25	1941	5.75	32	6
		5.75	83	5
		5.75	199	4
26	1958	5	12	6
		5	40	5
		5.75	13	6
		5.75	39	5
27	1962	5	9	6
		5	30	5
		5	18	5
		6.1	7	8
		6.1	13	7
		6.1	208	5
		6.1	37	6
		6.1	18	6
28	1964	5.1	32	5
		5.1	90	4
29	1968	5.2	11	6
30	1969	6.4	18	7
		6.4	37	6
31	1977	5	29	5
		5	93	4
32	1982	5	9	6
		5	44	5
