# Supplementary material
Source: MDPI journal article supplement (https://www.mdpi.com/2076-3263/9/10/422)
Supplement: s1 [file s1 › Shear wave velocity data.xlsx]

## Sheet: SEA-Vs
Melbourne			South Australia			CRUST1.0
Vs (km/s)	Z (km)		Vs (km/s)	Z (km)		Vs (km/s)	Z (km)
0.4	0.002		0.33	0.02		3.63	12.85
0.45	0.004		1	0.02		3.63	15.36
0.45	0.012		1.25	0.02		3.5	13.73
0.55	0.016		1.5	0.04		2.7	1.02
0.65	0.02		0.75	0.06		3.63	16.91
1.4	0.02		1.6	0.08		3.63	19.19
2	0.2		1.6	0.1		3.63	16.87
2.696	3.9		1.5	0.12		3.63	11.65
			1.6	0.12		3.63	11.96
						3.5	12.41
						3.63	12.67
						3.5	12.31
						3.55	17.13

## Sheet: SEC-Vs
South China Continent			South-eastern China			HKU database			CRUST1.0
Vs (km/s)	Z (km)		Vs (km/s)	Z (km)		Vs (km/s)	Z (km)		Vs (km/s)	Z (km)
2.26719	0.05		1.8	0.01		1.5	0.01		3.54	11.54
2.08147	0.1		2.1	0.02		1.2	0.01		3.55	11.23
2.38607	0.1		1.9	0.03		1.8	0.03		3.55	10.92
2.13224	0.1		2	0.05		1.5	0.05		3.55	9.97
2.33531	0.1		2.4	0.1		2	0.1		3.5	10.53
2.45878	0.5		3	0.5		2.5	0.3		3.55	10.48
3.1735	2		2.9	1		2.8	1		3.55	10.48
3.5197	2		2.9	2		3	1		3.55	9.92
3.5774	10		3	2					3.55	9.92
3.4043	20		3.5	3					3.55	9.96
3.7505	20		3.4	3					3.55	10.23
3.8659	30		3.5	5					3.55	10.01
			3.5	5					3.55	10.01
			3.5	8					3.55	10.17
			3.5	8					3.55	10.04
			3.5	20
			3.6	20
